# Supplementary material
Source: PubMed Central journal article supplement (PMC3578564)
Supplement: ismej2012116x2.pdf [file ismej2012116x2.pdf]

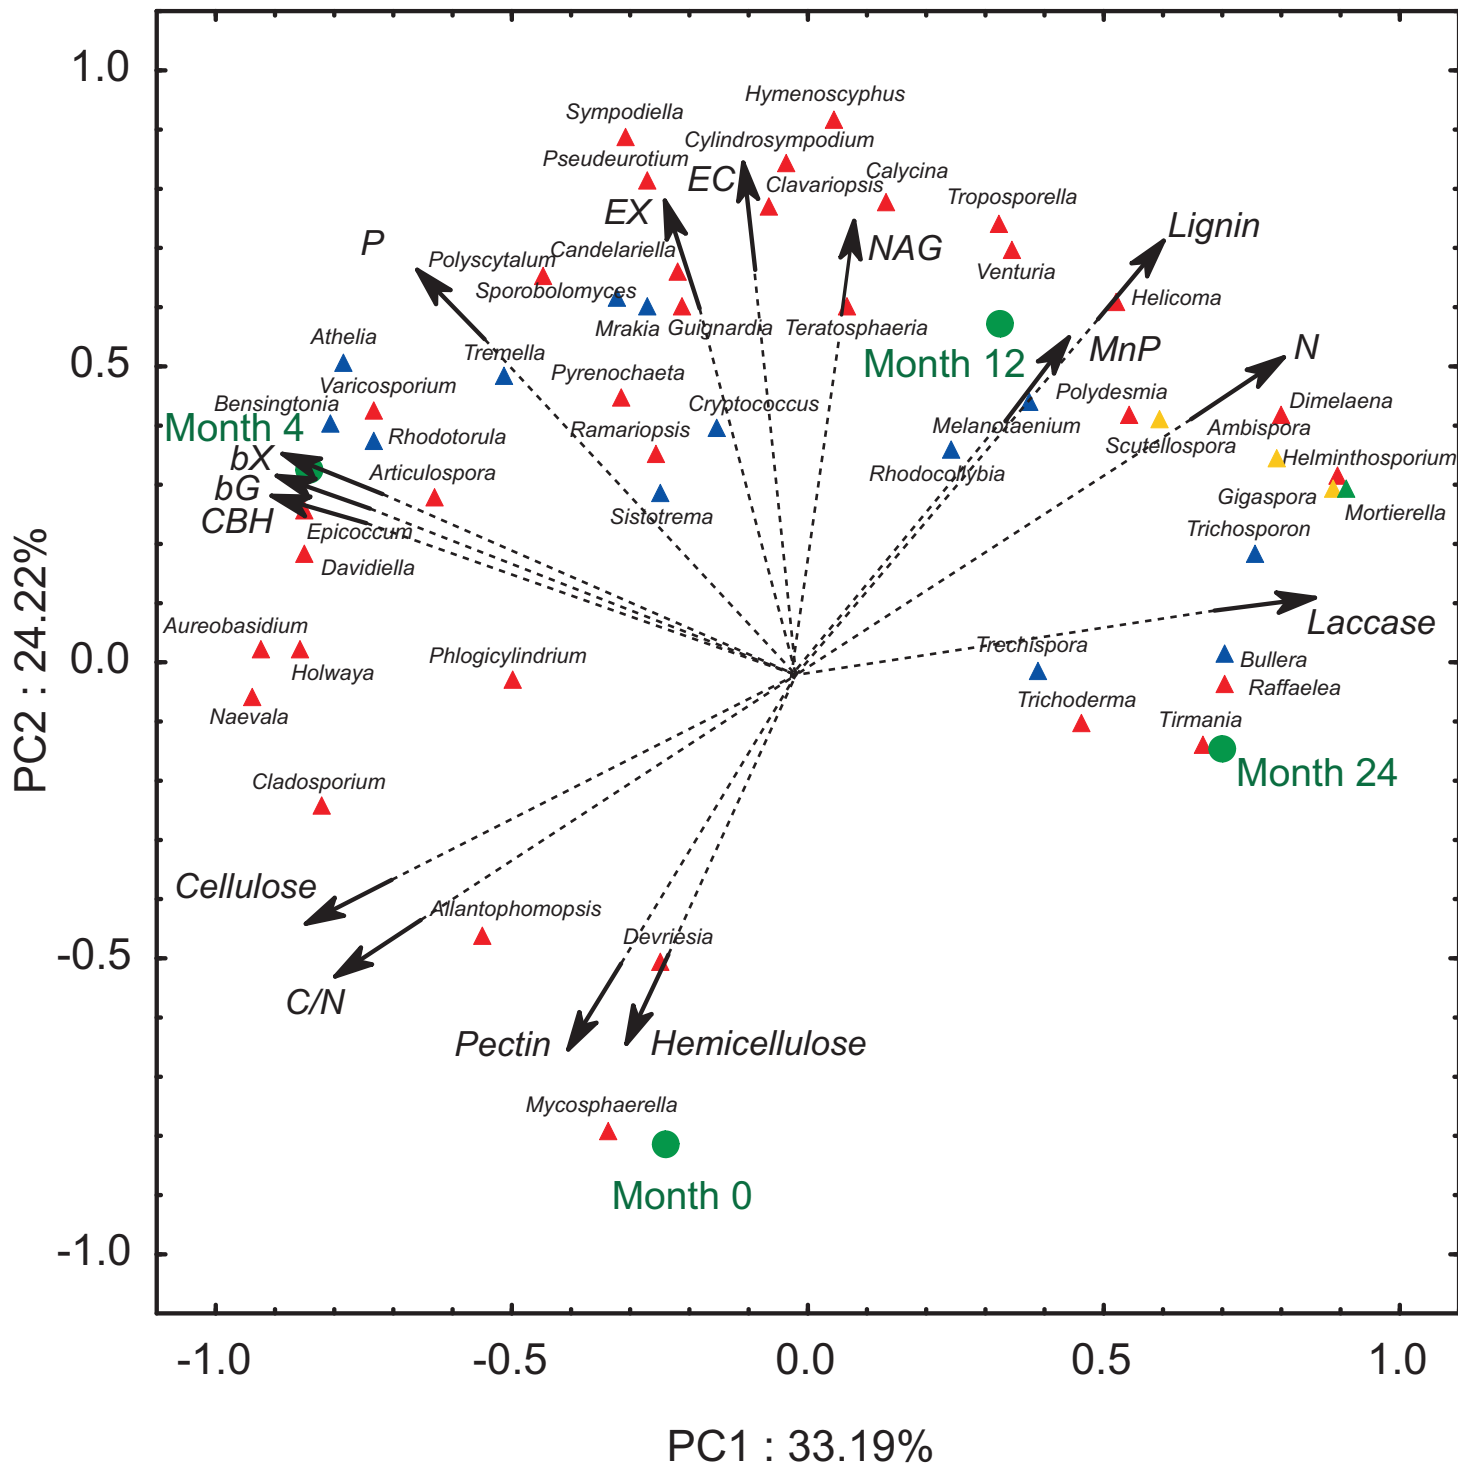

Supplementary Figure 2. Principal component analysis of the relative abundance of the fifty most abundant fungal genera in *Quercus petraea* senescent leaves and after 4, 12, and 24 months of decomposition. *Ascomycota* – red, *Basidiomycota* – blue, *Glomeromycota* – yellow, *Mucoromycotina* – green. Green circles with numbers indicate the effects of decomposition age, arrows mark the position of environmental covariables (litter chemistry and activity of extracellular enzymes).
