# Supplementary material
Source: PubMed Central journal article supplement (PMC3578564)
Supplement: ismej2012116x3.pdf [file ismej2012116x3.pdf]

## Supplementary Tables

Supplementary Table 1: Identification of 50 most abundant fungal OTUs according to NCBI Blast, their relative abundance and distribution during litter degradation. Data of relative abundance are expressed as means from three litterbags, standard errors are shown in italic. Statistically significant differences in relative abundance among litterbags from -2, 0, 2, 4, 8, 12 and 24 month (ANOVA followed by Fisher post-hoc test) are indicated by different letters. Fungal divisions: A – *Ascomycota*, B – *Basidiomycota*, G – *Glomeromycota*

| OTU | Order (division)        | Best identified hit (accession number)        | Similarity |         | Abundance <sup>1</sup> (%) | Relative abundance in different month (%) |   |             |   |              |    |              |    |             |   |              |   |             |   |
|-----|-------------------------|-----------------------------------------------|------------|---------|----------------------------|-------------------------------------------|---|-------------|---|--------------|----|--------------|----|-------------|---|--------------|---|-------------|---|
|     |                         |                                               | (%)        | E-value |                            | -2                                        | 0 | 2           | 4 | 8            | 12 | 24           |    |             |   |              |   |             |   |
| 0   | <i>Capnodiales</i> (A)  | <i>Mycosphaerella punctiformis</i> (EU343174) | 100        | 0.0     | 174.1                      | 276.5                                     | b | 893.3       | a | 37.3         | c  | 6.1          | c  | 0.3         | c | 3.1          | c | 2.3         | c |
|     |                         |                                               |            |         |                            | <i>99.5</i>                               |   | <i>39.5</i> |   | <i>30.7</i>  |    | <i>4.2</i>   |    | <i>0.3</i>  |   | <i>2.3</i>   |   | <i>0.4</i>  |   |
| 1   | <i>Helotiales</i> (A)   | <i>Naevala minutissima</i> (AY853218)         | 99         | 0.0     | 123.4                      | 25.3                                      | b | 14.6        | b | 374.2        | a  | 444.9        | a  | 3.4         | b | 0.3          | b | 0.9         | b |
|     |                         |                                               |            |         |                            | <i>11.3</i>                               |   | <i>10.2</i> |   | <i>142.9</i> |    | <i>152.4</i> |    | <i>1.4</i>  |   | <i>0.3</i>   |   | <i>0.9</i>  |   |
| 3   | <i>Polyporales</i> (A)  | <i>Tropospora fumosa</i> (DQ351724)           | 93         | E-164   | 61.2                       | 0.0                                       | b | 0.0         | b | 3.3          | b  | 1.1          | b  | 206.4       | a | 216.3        | a | 1.1         | b |
|     |                         |                                               |            |         |                            | <i>0.0</i>                                |   | <i>0.0</i>  |   | <i>1.1</i>   |    | <i>0.5</i>   |    | <i>29.3</i> |   | <i>36.6</i>  |   | <i>0.5</i>  |   |
| 2   | <i>Tremellales</i> (B)  | <i>Trichosporon porosum</i> (AF414694)        | 100        | 0.0     | 53                         | 4.6                                       | b | 0.0         | b | 1.7          | b  | 0.0          | b  | 2.6         | b | 39.5         | b | 322.4       | a |
|     |                         |                                               |            |         |                            | <i>2.0</i>                                |   | <i>0.0</i>  |   | <i>1.7</i>   |    | <i>0.0</i>   |    | <i>2.1</i>  |   | <i>39.5</i>  |   | <i>55.3</i> |   |
| 4   | <i>Atheliales</i> (B)   | <i>Athelia bombacina</i> (DQ449026)           | 86         | E-108   | 39.1                       | 0.0                                       | b | 0.0         | b | 183.7        | a  | 89.4         | ab | 0.3         | b | 0.0          | b | 0.0         | b |
|     |                         |                                               |            |         |                            | <i>0.0</i>                                |   | <i>0.0</i>  |   | <i>108.2</i> |    | <i>36.2</i>  |    | <i>0.3</i>  |   | <i>0.0</i>   |   | <i>0.0</i>  |   |
| 5   | <i>Tremellales</i> (B)  | <i>Trichosporon moniliiforme</i> (AF444415)   | 99         | 0.0     | 18.6                       | 0.8                                       | b | 0.0         | b | 0.0          | b  | 0.6          | b  | 0.3         | b | 1.5          | b | 126.7       | a |
|     |                         |                                               |            |         |                            | <i>0.5</i>                                |   | <i>0.0</i>  |   | <i>0.0</i>   |    | <i>0.6</i>   |    | <i>0.3</i>  |   | <i>1.2</i>   |   | <i>33.8</i> |   |
| 11  | <i>Polyporales</i> (A)  | <i>Tropospora fumosa</i> (DQ351724)           | 94         | E-167   | 17.1                       | 0.0                                       | b | 0.0         | b | 0.0          | b  | 0.0          | b  | 70.4        | a | 49           | a | 0.3         | b |
|     |                         |                                               |            |         |                            | <i>0.0</i>                                |   | <i>0.0</i>  |   | <i>0.0</i>   |    | <i>0.0</i>   |    | <i>14.5</i> |   | <i>39.0</i>  |   | <i>0.3</i>  |   |
| 10  | <i>Tremellales</i> (B)  | <i>Cryptococcus podzolicus</i> (AJ581036)     | 99         | 0.0     | 16.9                       | 58.6                                      | a | 0.1         | b | 26.2         | b  | 0.0          | b  | 28.1        | b | 4.4          | b | 0.8         | b |
|     |                         |                                               |            |         |                            | <i>20.5</i>                               |   | <i>0.1</i>  |   | <i>11.0</i>  |    | <i>0.0</i>   |    | <i>8.2</i>  |   | <i>3.2</i>   |   | <i>0.5</i>  |   |
| 9   | (A)                     | <i>Helminthosporium solani</i> (DQ865090)     | 84         | 5E-27   | 16                         | 0.9                                       | b | 0.0         | b | 0.0          | b  | 0.0          | b  | 0.0         | b | 20.9         | b | 90.2        | a |
|     |                         |                                               |            |         |                            | <i>0.5</i>                                |   | <i>0.0</i>  |   | <i>0.0</i>   |    | <i>0.0</i>   |    | <i>0.0</i>  |   | <i>10.6</i>  |   | <i>36.4</i> |   |
| 6   | (B)                     | <i>Sistotrema alboluteum</i> (AJ606042)       | 98         | E-93    | 15.1                       | 0.0                                       |   | 0.0         |   | 0.0          |    | 0.0          |    | 0.0         |   | 105.4        |   | 0.0         |   |
|     |                         |                                               |            |         |                            | <i>0.0</i>                                |   | <i>0.0</i>  |   | <i>0.0</i>   |    | <i>0.0</i>   |    | <i>0.0</i>  |   | <i>105.4</i> |   | <i>0.0</i>  |   |
| 8   | <i>Dothideales</i> (A)  | <i>Aureobasidium pullulans</i> (GU062250)     | 100        | 0.0     | 14.9                       | 69.6                                      | a | 2.9         | b | 11.5         | b  | 10           | b  | 9.7         | b | 0.6          | b | 0.0         | b |
|     |                         |                                               |            |         |                            | <i>9.5</i>                                |   | <i>1.5</i>  |   | <i>2.4</i>   |    | <i>2.3</i>   |    | <i>7.2</i>  |   | <i>0.6</i>   |   | <i>0.0</i>  |   |
| 13  | <i>Microascales</i> (A) | <i>Clavariopsis aquatica</i> (GQ152143)       | 94         | E-159   | 14.7                       | 0.0                                       |   | 0.0         |   | 35.5         |    | 7.3          |    | 35.7        |   | 23.8         |   | 0.6         |   |
|     |                         |                                               |            |         |                            | <i>0.0</i>                                |   | <i>0.0</i>  |   | <i>18.6</i>  |    | <i>4.8</i>   |    | <i>16.8</i> |   | <i>18.4</i>  |   | <i>0.3</i>  |   |
| 14  | (A)                     | <i>Guignardia mangiferae</i> (FJ769722)       | 99         | 3E-87   | 14.3                       | 0.0                                       | b | 0.0         | b | 1.3          | b  | 1.7          | b  | 94.8        | a | 1.9          | b | 0.3         | b |
|     |                         |                                               |            |         |                            | <i>0.0</i>                                |   | <i>0.0</i>  |   | <i>0.8</i>   |    | <i>1.1</i>   |    | <i>27.1</i> |   | <i>1.3</i>   |   | <i>0.3</i>  |   |
| 7   | <i>Helotiales</i> (A)   | <i>Allantophomopsis lycopodina</i> (AB041243) | 88         | E-126   | 12.9                       | 86.1                                      | a | 2.8         | b | 0.6          | b  | 0.5          | b  | 0.0         | b | 0.0          | b | 0.0         | b |
|     |                         |                                               |            |         |                            | <i>31.7</i>                               |   | <i>1.2</i>  |   | <i>0.6</i>   |    | <i>0.5</i>   |    | <i>0.0</i>  |   | <i>0.0</i>   |   | <i>0.0</i>  |   |
| 25  | <i>Agaricales</i> (B)   | <i>Rhodocollybia butyracea</i> (AY313291)     | 100        | 0.0     | 10.7                       | 0.0                                       |   | 0.0         |   | 0.0          |    | 0.0          |    | 0.0         |   | 74.9         |   | 0.3         |   |
|     |                         |                                               |            |         |                            | <i>0.0</i>                                |   | <i>0.0</i>  |   | <i>0.0</i>   |    | <i>0.0</i>   |    | <i>0.0</i>  |   | <i>74.9</i>  |   | <i>0.3</i>  |   |
| 18  | (A)                     | <i>Dimelaena oreina</i> (AF224352)            | 97         | E-71    | 10.4                       | 0.0                                       |   | 0.0         |   | 0.0          |    | 0.0          |    | 4.0         |   | 63.2         |   | 5.5         |   |
|     |                         |                                               |            |         |                            | <i>0.0</i>                                |   | <i>0.0</i>  |   | <i>0.0</i>   |    | <i>0.0</i>   |    | <i>4.0</i>  |   | <i>62.4</i>  |   | <i>5.0</i>  |   |
| 12  | <i>Capnodiales</i> (A)  | <i>Davidiella macrospora</i> (AF297231)       | 100        | 0.0     | 10.2                       | 36.8                                      | a | 0.5         | d | 20           | b  | 11.4         | c  | 2.5         | d | 0.0          | d | 0.0         | d |
|     |                         |                                               |            |         |                            | <i>11.5</i>                               |   | <i>0.3</i>  |   | <i>8.6</i>   |    | <i>1.5</i>   |    | <i>1.5</i>  |   | <i>0.0</i>   |   | <i>0.0</i>  |   |
| 16  | <i>Capnodiales</i> (A)  | <i>Cladosporium chubutense</i> (FJ936158)     | 100        | 0.0     | 7.9                        | 44.9                                      | a | 1.1         | b | 4.1          | b  | 2.8          | b  | 2.4         | b | 0.0          | b | 0.0         | b |
|     |                         |                                               |            |         |                            | <i>14.3</i>                               |   | <i>0.3</i>  |   | <i>2.6</i>   |    | <i>1.4</i>   |    | <i>1.8</i>  |   | <i>0.0</i>   |   | <i>0.0</i>  |   |

|                            |                                                 |     |       |      |        |        |         |        |        |        |        |
|----------------------------|-------------------------------------------------|-----|-------|------|--------|--------|---------|--------|--------|--------|--------|
| 22 (B)                     | <i>Clavulinopsis helvola</i> (EU118617)         | 97  | 4E-86 | 7.8  | 0.0 b  | 0.0 b  | 0.0 b   | 0.9 b  | 53.1 a | 0.6 b  | 0.0 b  |
|                            |                                                 |     |       | 0.0  | 0.0    | 0.0    | 0.5     | 25.8   | 0.6    | 0.0    |        |
| 15 Helotiales (A)          | <i>Holwaya mucida</i> (DQ257357)                | 91  | E-148 | 7.8  | 42.4 a | 1.8 b  | 5.4 b   | 5.1 b  | 0.0 b  | 0.0 b  | 0.0 b  |
|                            |                                                 |     |       | 11.4 | 1.3    | 1.2    | 0.4     | 0.0    | 0.0    | 0.0    | 0.0    |
| 19 (A)                     | <i>Raffaelea scolytoidis</i> (AM267270)         | 87  | 6E-26 | 6.9  | 0.9 b  | 0.0 b  | 0.0 b   | 0.0 b  | 0.0 b  | 0.4 b  | 47.2 a |
|                            |                                                 |     |       | 0.9  | 0.0    | 0.0    | 0.0     | 0.0    | 0.0    | 0.4    | 38.6   |
| 17 (A)                     | <i>Polydesmia pruinosa</i> (AY775053)           | 97  | E-71  | 6.9  | 0.0 b  | 0.0 b  | 0.0 b   | 0.0 b  | 0.7 b  | 41.5 a | 5.8 ab |
|                            |                                                 |     |       | 0.0  | 0.0    | 0.0    | 0.0     | 0.7    | 33.5   | 5.4    |        |
| 21 Capnodiales (A)         | <i>Devriesia americana</i> (AY251068)           | 96  | E-111 | 5.8  | 39.9 a | 0.5 b  | 0.0 b   | 0.5 b  | 0.0 b  | 0.0 b  | 0.0 b  |
|                            |                                                 |     |       | 8.8  | 0.5    | 0.0    | 0.5     | 0.0    | 0.0    | 0.0    | 0.0    |
| 24 (A)                     | <i>Tirmania pinoyi</i> (GQ888695)               | 84  | 4E-93 | 5.5  | 0.0 b  | 0.0 b  | 0.0 b   | 0.0 b  | 0.0 b  | 0.0 b  | 38.3 a |
|                            |                                                 |     |       | 0.0  | 0.0    | 0.0    | 0.0     | 0.0    | 0.0    | 0.0    | 15.8   |
| 27 (G)                     | <i>Gigaspora margarita</i> (AJ006850)           | 84  | 6E-26 | 5.3  | 0.6 b  | 0.0 b  | 0.3 b   | 0.0 b  | 2.3 b  | 9.8 b  | 24.1 a |
|                            |                                                 |     |       | 0.3  | 0.0    | 0.3    | 0.0     | 1.8    | 8.0    | 8.9    |        |
| 31 Cystofilobasidiales (B) | <i>Mrakia frigida</i> (AJ866977)                | 99  | 0.0   | 4.9  | 0.0    | 0.0    | 33.7    | 0.6    | 0.0    | 0.0    | 0.0    |
|                            |                                                 |     |       | 0.0  | 0.0    | 31.9   | 0.6     | 0.0    | 0.0    | 0.0    | 0.0    |
| 41 Pleosporales (A)        | <i>Cylindrosyodium lauri</i> (EU035414)         | 97  | E-178 | 4.8  | 0.0 b  | 0.0 b  | 2.0 b   | 0.6 b  | 30.1 a | 1.1 b  | 0.0 b  |
|                            |                                                 |     |       | 0.0  | 0.0    | 1.0    | 0.6     | 17.0   | 0.8    | 0.0    | 0.0    |
| 33 Helotiales (A)          | <i>Hymenoscyphus epiphyllus</i> (DQ431170)      | 99  | 0.0   | 4.6  | 0.0 b  | 0.0 b  | 0.0 b   | 6.0 ab | 24.3 a | 2.2 b  | 0.0 b  |
|                            |                                                 |     |       | 0.0  | 0.0    | 0.0    | 6.0     | 17.1   | 1.8    | 0.0    | 0.0    |
| 30 (G)                     | <i>Ambispora gerdemannii</i> (AJ012111)         | 89  | 5E-34 | 4.2  | 0.3 b  | 0.0 b  | 0.0 b   | 0.0 b  | 0.0 b  | 0.0 b  | 29.2 a |
|                            |                                                 |     |       | 0.3  | 0.0    | 0.0    | 0.0     | 0.0    | 0.0    | 0.0    | 16.5   |
| 26 Xylariales (A)          | <i>Phlogicylindrium eucalyptorum</i> (EU040223) | 88  | E-128 | 4.1  | 24.4   | 4.0    | 0.4     | 0.0    | 0.0    | 0.0    | 0.0    |
|                            |                                                 |     |       | 24.0 | 3.8    | 0.4    | 0.0     | 0.0    | 0.0    | 0.0    | 0.0    |
| 43 (A)                     | <i>Polyscytalum algarvense</i> (GQ303287)       | 97  | 0.0   | 3.7  | 0.0    | 0.0    | 1.8     | 23.5   | 0.0    | 0.0    | 0.6    |
|                            |                                                 |     |       | 0.0  | 0.0    | 1.8    | 23.5    | 0.0    | 0.0    | 0.6    | 0.6    |
| 37 (A)                     | <i>Symptodiella acicola</i> (EU449953)          | 96  | E-121 | 3.4  | 0.0 b  | 0.0 b  | 1.0 b   | 2.9 b  | 20.0 a | 0.0 b  | 0.0 b  |
|                            |                                                 |     |       | 0.0  | 0.0    | 0.6    | 2.2     | 4.2    | 0.0    | 0.0    | 0.0    |
| 38 Cystofilobasidiales (B) | <i>Cryptococcus huempfi</i> (AF444322)          | 89  | E-121 | 3.3  | 0.0 b  | 0.0 b  | 8.3 a   | 13.4 a | 1.1 b  | 0.3 b  | 0.0 b  |
|                            |                                                 |     |       | 0.0  | 0.0    | 4.2    | 1.4     | 0.6    | 0.3    | 0.0    | 0.0    |
| 42 Pleosporales (A)        | <i>Epicoccum nigrum</i> (GQ996573)              | 100 | 0.0   | 3    | 10.2 a | 0.3 b  | 4.3 b   | 4.7 ab | 1.5 b  | 0.0 b  | 0.0 b  |
|                            |                                                 |     |       | 2.0  | 0.2    | 1.2    | 4.0     | 1.5    | 0.0    | 0.0    | 0.0    |
| 39 Hypocreales (A)         | <i>Trichoderma asperellum</i> (FJ605245)        | 100 | 0.0   | 3    | 10.4 a | 0.2 b  | 3.8 ab  | 0.0 b  | 5.8 ab | 0.8 b  | 0.0 b  |
|                            |                                                 |     |       | 5.8  | 0.2    | 2.6    | 0.0     | 3.2    | 0.8    | 0.0    | 0.0    |
| 56 Helotiales (A)          | <i>Calycina herbarum</i> (AM262399)             | 94  | E-142 | 2.8  | 0.0 b  | 0.0 b  | 0.0 b   | 0.0 b  | 0.0 b  | 19.3 a | 0.0 b  |
|                            |                                                 |     |       | 0.0  | 0.0    | 0.0    | 0.0     | 0.0    | 15.2   | 0.0    | 0.0    |
| 29 Helotiales (A)          | <i>Naevalea minutissima</i> (AY853218)          | 99  | 0.0   | 2.7  | 0.8 bc | 7.9 a  | 3.6 abc | 6.6 ab | 0.0 c  | 0.0 c  | 0.0 c  |
|                            |                                                 |     |       | 0.4  | 3.5    | 1.8    | 3.4     | 0.0    | 0.0    | 0.0    | 0.0    |
| 61 Helotiales (A)          | <i>Naevalea minutissima</i> (AY853218)          | 97  | E-174 | 2.7  | 0.6 b  | 0.0 b  | 4.3 b   | 13.0 a | 0.0 b  | 0.6 b  | 0.0 b  |
|                            |                                                 |     |       | 0.6  | 0.0    | 2.3    | 3.9     | 0.0    | 0.6    | 0.0    | 0.0    |
| 28 Capnodiales (A)         | <i>Mycosphaerella punctiformis</i> (EU343174)   | 99  | E-180 | 2.7  | 2.0 b  | 13.6 a | 1.2 b   | 1.9 b  | 0.0 b  | 0.0 b  | 0.0 b  |
|                            |                                                 |     |       | 1.0  | 2.7    | 1.2    | 1.2     | 0.0    | 0.0    | 0.0    | 0.0    |
| 35 Trechisporales (B)      | <i>Trechispora alnicola</i> (DQ411529)          | 96  | E-180 | 2.6  | 0.0    | 0.0    | 0.0     | 0.0    | 0.0    | 0.0    | 18.5   |
|                            |                                                 |     |       | 0.0  | 0.0    | 0.0    | 0.0     | 0.0    | 0.0    | 0.0    | 18.5   |
| 48 Helotiales (A)          | <i>Hymenoscyphus epiphyllus</i> (DQ431180)      | 100 | 0.0   | 2.6  | 0.0 b  | 0.0 b  | 0.6 b   | 0.6 b  | 12.8 a | 4.0 ab | 0.2 b  |
|                            |                                                 |     |       | 0.0  | 0.0    | 0.6    | 0.6     | 7.7    | 2.0    | 0.2    | 0.2    |
| 36 Cystofilobasidiales (B) | <i>Trichosporon lignicola</i> (AF444482)        | 99  | 0.0   | 2.6  | 3.8 ab | 0.0 b  | 5.9 a   | 0.0 b  | 5.4 ab | 2.5 ab | 0.7 ab |
|                            |                                                 |     |       | 1.4  | 0.0    | 2.4    | 0.0     | 2.9    | 2.5    | 0.7    | 0.7    |

|     |                         |                                               |    |       |     |        |       |        |       |        |        |       |
|-----|-------------------------|-----------------------------------------------|----|-------|-----|--------|-------|--------|-------|--------|--------|-------|
| 47  | <i>Pleosporales</i> (A) | <i>Pseudeurotium bakeri</i> (FJ903285)        | 92 | E-153 | 2.5 | 0.0 b  | 0.0 b | 1.6 b  | 0.6 b | 4.1 ab | 11.2 a | 0.0 b |
|     |                         |                                               |    |       | 0.0 | 0.0    | 0.8   | 0.6    | 1.5   | 7.0    | 0.0    | 0.0   |
| 34  | <i>Pleosporales</i> (A) | <i>Pleurophoma cava</i> (GU062248)            | 99 | 0.0   | 2.5 | 11.9 a | 0.1 b | 3.5 b  | 0.5 b | 0.3 b  | 1.0 b  | 0.0 b |
|     |                         |                                               |    |       | 3.7 | 0.1    | 2.1   | 0.5    | 0.3   | 1.0    | 0.0    | 0.0   |
| 139 | <i>Pleosporales</i> (A) | <i>Venturia hystrioides</i> (EU035459)        | 97 | 0.0   | 2.5 | 0.0    | 0.0   | 0.3    | 0.0   | 16.7   | 0.0    | 0.3   |
|     |                         |                                               |    |       | 0.0 | 0.0    | 0.3   | 0.0    | 15.6  | 0.0    | 0.3    | 0.3   |
| 54  | (A)                     | <i>Candelariella corallizoides</i> (EF535176) | 97 | 6E-70 | 2.4 | 0.0 b  | 0.0 b | 2.1 b  | 0.6 b | 13.7 a | 0.6 b  | 0.0 b |
|     |                         |                                               |    |       | 0.0 | 0.0    | 2.1   | 0.6    | 5.2   | 0.6    | 0.0    | 0.0   |
| 46  | (A)                     | <i>Symptodiella acicola</i> (EU449953)        | 96 | E-124 | 2.4 | 0.0 b  | 0.0 b | 1.6 b  | 1.8 b | 13.5 a | 0.0 b  | 0.0 b |
|     |                         |                                               |    |       | 0.0 | 0.0    | 0.8   | 1.8    | 3.8   | 0.0    | 0.0    | 0.0   |
| 45  | (B)                     | <i>Melanotaenium euphorbiae</i> (DQ875348)    | 81 | 4E-27 | 2.4 | 0.3    | 0.0   | 8.0    | 3.5   | 3.3    | 0.0    | 1.5   |
|     |                         |                                               |    |       | 0.3 | 0.0    | 6.5   | 1.2    | 3.3   | 0.0    | 0.7    | 0.7   |
| 74  | (A)                     | <i>Gyoerffyella rotula</i> (AY729937)         | 97 | E-179 | 2.2 | 1.3 b  | 0.0 b | 4.9 ab | 9.2 a | 0.0 b  | 0.0 b  | 0.0 b |
|     |                         |                                               |    |       | 1.3 | 0.0    | 3.2   | 3.0    | 0.0   | 0.0    | 0.0    | 0.0   |
| 57  | <i>Polyporales</i> (A)  | <i>Troposporella fumosa</i> (DQ351724)        | 91 | E-148 | 2.1 | 0.0 b  | 0.0 b | 1.5 b  | 0.9 b | 11.4 a | 0.9 b  | 0.0 b |
|     |                         |                                               |    |       | 0.0 | 0.0    | 1.5   | 0.9    | 2.6   | 0.9    | 0.0    | 0.0   |

<sup>1</sup>Mean relative abundance in all samples.

Supplementary Table 2: Overview of 30 most abundant *cbhl* OUs with their relative abundance and distribution during litter degradation. Data of relative abundance are expressed as means from three litterbags, standard errors are shown in italic. Statistically significant differences in relative abundance among litterbags (ANOVA followed by Fisher post-hoc test) are indicated by different letters.

| OU | Abundance <sup>1</sup> (%) | Relative abundance in different month (‰) |                         |                        |                       |
|----|----------------------------|-------------------------------------------|-------------------------|------------------------|-----------------------|
|    |                            | -2                                        | 0                       | 4                      | 12                    |
| 4  | 279.3                      | 963.2 a<br><i>24.5</i>                    | 153.8 b<br><i>4.3</i>   | 0.0 c<br><i>0.0</i>    | 0.0 c<br><i>0.0</i>   |
| 0  | 125.4                      | 16.7 c<br><i>16.7</i>                     | 246.1 ab<br><i>10.0</i> | 237.1 b<br><i>26.1</i> | 1.7 c<br><i>0.8</i>   |
| 1  | 71.5                       | 0.0 c<br><i>0.0</i>                       | 115.8 ab<br><i>14.3</i> | 170.1 b<br><i>45.1</i> | 0.0 c<br><i>0.0</i>   |
| 2  | 62.2                       | 5.6 c<br><i>5.6</i>                       | 109.5 ab<br><i>5.1</i>  | 129.4 b<br><i>28.4</i> | 4.3 c<br><i>4.3</i>   |
| 3  | 40.1                       | 0.0<br><i>0.0</i>                         | 6.4<br><i>6.4</i>       | 41.8<br><i>29.6</i>    | 112.4<br><i>67.6</i>  |
| 5  | 34.4                       | 0.0 c<br><i>0.0</i>                       | 72.7 ab<br><i>7.2</i>   | 63.0 b<br><i>13.0</i>  | 1.7 c<br><i>1.7</i>   |
| 7  | 21.3                       | 0.0<br><i>0.0</i>                         | 1.6<br><i>1.6</i>       | 21.7<br><i>9.7</i>     | 61.7<br><i>45.4</i>   |
| 17 | 21.2                       | 5.6 c<br><i>5.6</i>                       | 40.2 ab<br><i>4.4</i>   | 38.9 b<br><i>5.6</i>   | 0.0 c<br><i>0.0</i>   |
| 6  | 21.2                       | 0.0 b<br><i>0.0</i>                       | 3.2 b<br><i>3.2</i>     | 80.6 a<br><i>43.2</i>  | 0.8 b<br><i>0.8</i>   |
| 12 | 18.8                       | 0.0 b<br><i>0.0</i>                       | 66.3 a<br><i>13.1</i>   | 6.4 b<br><i>1.8</i>    | 2.3 b<br><i>1.3</i>   |
| 8  | 13.3                       | 0.0<br><i>0.0</i>                         | 0.0<br><i>0.0</i>       | 0.9<br><i>0.9</i>      | 52.2<br><i>39.7</i>   |
| 16 | 11.9                       | 0.0 c<br><i>0.0</i>                       | 27.9 ab<br><i>7.6</i>   | 19.7 b<br><i>6.1</i>   | 0.0 c<br><i>0.0</i>   |
| 10 | 11.8                       | 0.0<br><i>0.0</i>                         | 0.0<br><i>0.0</i>       | 0.0<br><i>0.0</i>      | 47.4<br><i>47.4</i>   |
| 11 | 11.8                       | 0.0<br><i>0.0</i>                         | 0.0<br><i>0.0</i>       | 0.0<br><i>0.0</i>      | 47.4<br><i>47.4</i>   |
| 9  | 11.1                       | 0.0<br><i>0.0</i>                         | 0.0<br><i>0.0</i>       | 4.3<br><i>2.3</i>      | 40.2<br><i>26.8</i>   |
| 13 | 10.1                       | 0.0<br><i>0.0</i>                         | 0.0<br><i>0.0</i>       | 0.0<br><i>0.0</i>      | 40.2<br><i>40.2</i>   |
| 14 | 9.7                        | 0.0<br><i>0.0</i>                         | 0.0<br><i>0.0</i>       | 0.0<br><i>0.0</i>      | 38.8<br><i>38.8</i>   |
| 18 | 9.2                        | 0.0<br><i>0.0</i>                         | 0.0<br><i>0.0</i>       | 0.0<br><i>0.0</i>      | 36.9<br><i>36.9</i>   |
| 15 | 8.9                        | 0.0<br><i>0.0</i>                         | 0.0<br><i>0.0</i>       | 0.0<br><i>0.0</i>      | 35.7<br><i>29.2</i>   |
| 25 | 8.1                        | 0.0 c<br><i>0.0</i>                       | 16.0 ab<br><i>2.8</i>   | 16.4 b<br><i>4.0</i>   | 0.0 c<br><i>0.0</i>   |
| 19 | 7.8                        | 0.0 b<br><i>0.0</i>                       | 0.0 b<br><i>0.0</i>     | 0.7 ab<br><i>0.7</i>   | 30.4 a<br><i>18.6</i> |
| 22 | 6.4                        | 0.0<br><i>0.0</i>                         | 0.0<br><i>0.0</i>       | 0.0<br><i>0.0</i>      | 25.5<br><i>19.4</i>   |
| 23 | 6.2                        | 0.0 b<br><i>0.0</i>                       | 0.0 b<br><i>0.0</i>     | 2.6 b<br><i>1.3</i>    | 22.3 a<br><i>8.4</i>  |
| 24 | 6.1                        | 0.0<br><i>0.0</i>                         | 0.0<br><i>0.0</i>       | 1.9<br><i>1.1</i>      | 22.3<br><i>17.3</i>   |
| 20 | 5.9                        | 0.0<br><i>0.0</i>                         | 0.0<br><i>0.0</i>       | 23.5<br><i>17.3</i>    | 0.0<br><i>0.0</i>     |
| 26 | 5.9                        | 0.0 b<br><i>0.0</i>                       | 0.0 b<br><i>0.0</i>     | 0.6 b<br><i>0.6</i>    | 22.8 a<br><i>13.3</i> |
| 27 | 5.0                        | 0.0<br><i>0.0</i>                         | 0.0<br><i>0.0</i>       | 0.0<br><i>0.0</i>      | 20.2<br><i>14.2</i>   |
| 31 | 5.0                        | 0.0 c<br><i>0.0</i>                       | 11.1 ab<br><i>2.6</i>   | 9.0 b<br><i>2.7</i>    | 0.0 c<br><i>0.0</i>   |
| 28 | 4.3                        | 0.0<br><i>0.0</i>                         | 0.0<br><i>0.0</i>       | 0.0<br><i>0.0</i>      | 17.1<br><i>12.3</i>   |
| 39 | 4.0                        | 0.0 b<br><i>0.0</i>                       | 9.3 a<br><i>5.3</i>     | 6.6 ab<br><i>1.4</i>   | 0.0 b<br><i>0.0</i>   |

<sup>1</sup>Mean relative abundance in all samples.
